# Supplementary material for: Trends in China's anthropogenic emissions since 2010 as the consequence of clean air actions
Source: Copernicus journal article supplement (doi:10.5194/acp-18-14095-2018), 2018-10-04
Supplement: Supplementary file 1 [file acp-18-14095-2018-supplement.zip]

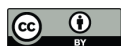

## *Supplement of*

# **Trends in China's anthropogenic emissions since 2010 as the consequence of clean air actions**

**Bo Zheng et al.**

*Correspondence to:* Qiang Zhang ([qiangzhang@tsinghua.edu.cn](mailto:qiangzhang@tsinghua.edu.cn))

- [acp-18-14095-2018-supplement-title-page.pdf](#)
- [Figure\\_data.xlsx](#)
- [SI\\_12Aug2018.pdf](#)

The copyright of individual parts of the supplement might differ from the CC BY 4.0 License.
