# Supplementary material for: Trends in China's anthropogenic emissions since 2010 as the consequence of clean air actions
Source: Copernicus journal article supplement (doi:10.5194/acp-18-14095-2018), 2018-10-04
Supplement: Supplementary file 1 [file Figure_data.xlsx]

## Sheet: Fig1
	Figure 1. China’s clean air policies implemented from 2010–2017
	Source sector	Emission source	2010	2011	2012	2013	2014	2015	2016	2017
	Power	Thermal power plants	GB 13223-2003		GB 13223-2011				“ultra-low” emission standard
	Industry	Flat glass	GB 9078-1996	GB 26453-2011
		Sinter	GB 9078-1996		GB 28662-2012
		Coking	GB 16171-1996		GB 16171-2012
		Iron	GB 9078-1996		GB 28663-2012
		Steel making	GB 9078-1996		GB 28664-2012
		Steel rolling	GB 9078-1996		GB 28665-2012
		Electronic glass	GB 9078-1996			GB 29495-2013
		Brick	GB 9078-1996				GB 29620-2013
		Cement	GB 4915-2004				GB 4915-2013
		Industrial boiler	GB 13271-2001				GB 13271-2014;
							Eliminate small coal-fired boilers.
		All	/			Phase out outdated industrial capacity; Strengthen emissions standards; Phase out small, high emitting factories; Install VOC emission control facilities
	Residential	All	No specific regulations			Replace coal with electricity and natural gas
	Transportation	Light duty gasoline vehicle	Euro 3	Euro 4						Euro 5
		Heavy duty gasoline vehicle	Euro 3			Euro 4
		Diesel vehicle	Euro III				Euro IV			Euro V
		All	/			Strengthen emissions standards; Retire old vehicles; Improve fuel quality

## Sheet: Fig2
	Figure 2. Emission trends and underlying social and economic factors
		Coal	GDP	Population	CO2	CO	SO2	NOx	PM2.5
	2010	1	1	1	1	1	1	1	1
	2011	1.12891	1.095	1.0048	1.11474	0.97994	1.0456	1.08265	1.01269
	2012	1.14273	1.18151	1.00979	1.1518	0.96705	1.02342	1.10167	1.00601
	2013	1.14011	1.27366	1.01477	1.15742	0.94764	0.91456	1.04658	0.96317
	2014	1.10309	1.36664	1.02007	1.14889	0.87884	0.73502	0.95509	0.87394
	2015	1.09085	1.46094	1.02514	1.14594	0.82397	0.60843	0.89513	0.77539
	2016	1.06508	1.55882	1.03117	1.13968	0.7615	0.48088	0.8505	0.68834
	2017	1.06859	1.66638	1.03667	1.15559	0.73064	0.37767	0.83038	0.64629

## Sheet: Fig3
	Figure 3. China’s anthropogenic emissions by sector and year
	a. SO2
	Unit: Tg	Power	Industry	Residential	Transportation	Solvent Use	Agriculture	Activity kept frozen	Pollution control frozen
	2010	7.77897	16.4001	3.39808	0.234313	0	0	27.8114	27.8114
	2011	7.92006	17.3311	3.57648	0.25198	0	0	26.3461	30.545
	2012	6.85281	17.6087	3.72753	0.273701	0	0	25.2275	31.0467
	2013	5.95317	15.8373	3.35471	0.290191	0	0	23.1138	30.1329
	2014	4.90682	12.1336	3.10515	0.296369	0	0	19.5573	28.6961
	2015	3.93461	9.80794	2.86287	0.315863	0	0	16.3532	28.3796
	2016	2.66884	7.67276	2.71174	0.320577	0	0	13.9514	27.234
	2017	1.83047	5.96977	2.37028	0.332925	0	0	10.2203	28.0946
	b. NOx
	Unit: Tg	Power	Industry	Residential	Transportation	Solvent Use	Agriculture	Activity kept frozen	Pollution control frozen
	2010	8.62995	9.14659	1.03271	7.66261	0	0	26.4719	26.4719
	2011	9.49203	10.1556	1.06011	7.95207	0	0	26.0939	29.0378
	2012	9.06627	10.5299	1.08441	8.48267	0	0	25.562	30.0731
	2013	7.94715	10.2982	0.97762	8.48199	0	0	23.8603	30.3165
	2014	6.18356	10.0155	0.94854	8.13541	0	0	21.9699	29.785
	2015	5.08048	9.72986	0.91149	7.97394	0	0	20.5211	29.6465
	2016	4.64146	9.2932	0.87655	7.70301	0	0	19.6056	29.3805
	2017	4.18657	9.22115	0.84874	7.72532	0	0	18.2247	30.229
	c. NMVOC
	Unit: Tg	Power	Industry	Residential	Transportation	Solvent Use	Agriculture	Activity kept frozen	Pollution control frozen
	2010	0.06684	7.8732	4.99476	6.05956	6.87023	0	25.8646	25.8646
	2011	0.07775	8.45822	5.00643	5.75101	7.62445	0	25.0358	27.7466
	2012	0.07766	8.85758	5.01434	5.62779	8.51265	0	24.4063	29.5483
	2013	0.07922	9.07845	4.78314	5.58412	8.56821	0	23.5675	30.3902
	2014	0.07757	9.2009	4.54537	5.11576	10.1284	0	22.6851	32.2476
	2015	0.07744	9.36178	4.21947	5.38748	9.45196	0	21.7955	32.5673
	2016	0.07957	9.30944	3.89743	4.96108	10.1088	0	21.0387	33.1822
	2017	0.08473	9.70762	3.60338	4.7861	10.4353	0	20.3869	34.0948
	d. NH3
	Unit: Tg	Power	Industry	Residential	Transportation	Solvent Use	Agriculture	Activity kept frozen	Pollution control frozen
	2010	0	0.27357	0.42656	0.02668	0	9.45528	10.1821	10.1821
	2011	0	0.29356	0.42096	0.029	0	9.80119	10.1821	10.5447
	2012	0	0.33836	0.41675	0.03134	0	9.9148	10.1821	10.7012
	2013	0	0.35313	0.39949	0.03503	0	9.84704	10.1821	10.6347
	2014	0	0.33752	0.37905	0.03612	0	9.7972	10.1821	10.5499
	2015	0	0.36178	0.3542	0.04122	0	9.72913	10.1821	10.4863
	2016	0	0.31665	0.33024	0.04221	0	9.63792	10.1821	10.327
	2017	0	0.30482	0.30905	0.04364	0	9.61156	10.1821	10.269
	e. CO
	Unit: Tg	Power	Industry	Residential	Transportation	Solvent Use	Agriculture	Activity kept frozen	Pollution control frozen
	2010	3.7911	79.6922	70.9483	31.9589	0	0	186.39	186.39
	2011	4.42871	76.329	71.6446	30.2499	0	0	173.464	195.579
	2012	4.50548	73.9627	72.4191	29.362	0	0	165.185	201.455
	2013	4.69217	72.9071	69.2825	29.7501	0	0	156.824	206.198
	2014	4.50351	65.3949	66.6651	27.244	0	0	146.022	204.176
	2015	4.46875	56.2315	63.9943	28.8848	0	0	133.887	206.083
	2016	4.57674	50.7529	60.4168	26.1906	0	0	125.116	203.211
	2017	4.83904	49.2072	56.9526	25.1861	0	0	118.782	203.794
	f. TSP
	Unit: Tg	Power	Industry	Residential	Transportation	Solvent Use	Agriculture	Activity kept frozen	Pollution control frozen
	2010	1.72318	24.668	5.28307	0.5575	0	0	32.2317	32.2317
	2011	1.82558	25.4087	5.33346	0.54932	0	0	31.0924	34.2563
	2012	1.7169	25.5308	5.36451	0.5597	0	0	30.176	35.2276
	2013	1.62634	24.5774	5.07346	0.55507	0	0	28.2094	35.8546
	2014	1.41526	20.3269	4.75474	0.53433	0	0	23.7793	35.4837
	2015	1.31703	15.6834	4.41066	0.52615	0	0	19.2374	34.9316
	2016	1.27973	12.0772	4.03351	0.52584	0	0	15.5346	34.6134
	2017	1.29193	11.1172	3.67512	0.57303	0	0	13.7962	35.0927
	g. PM10
	Unit: Tg	Power	Industry	Residential	Transportation	Solvent Use	Agriculture	Activity kept frozen	Pollution control frozen
	2010	1.31628	9.64904	4.81859	0.54332	0	0	16.3272	16.3272
	2011	1.40559	9.78766	4.86013	0.53457	0	0	15.5821	17.333
	2012	1.3307	9.69002	4.89201	0.54433	0	0	15.0298	17.7545
	2013	1.2593	9.34873	4.67835	0.53916	0	0	14.2597	17.8931
	2014	1.08682	8.12485	4.39637	0.51775	0	0	12.8353	17.6177
	2015	1.00811	6.69225	4.09258	0.50986	0	0	11.3917	17.2383
	2016	0.96398	5.57993	3.74465	0.50911	0	0	10.2472	16.8777
	2017	0.95789	5.24445	3.41261	0.5563	0	0	9.57429	16.9242
	h. PM2.5
	Unit: Tg	Power	Industry	Residential	Transportation	Solvent Use	Agriculture	Activity kept frozen	Pollution control frozen
	2010	0.83408	6.10018	4.32344	0.53225	0	0	11.7899	11.7899
	2011	0.90263	6.16953	4.34442	0.52301	0	0	11.287	12.4425
	2012	0.86167	6.10723	4.35968	0.53226	0	0	10.9366	12.7142
	2013	0.81579	5.83466	4.1786	0.52669	0	0	10.3804	12.7653
	2014	0.69797	5.17546	3.92558	0.50468	0	0	9.56282	12.5308
	2015	0.64286	4.36057	3.64126	0.49707	0	0	8.74289	12.1888
	2016	0.59074	3.70371	3.325	0.496	0	0	8.06497	11.8404
	2017	0.563	3.48834	3.02519	0.54319	0	0	7.61917	11.7905
	i. BC
	Unit: Tg	Power	Industry	Residential	Transportation	Solvent Use	Agriculture	Activity kept frozen	Pollution control frozen
	2010	0.00172	0.58903	0.84469	0.29401	0	0	1.72944	1.72944
	2011	0.00183	0.63588	0.85226	0.29031	0	0	1.71497	1.79475
	2012	0.00174	0.61116	0.86504	0.29716	0	0	1.67058	1.83396
	2013	0.00165	0.60922	0.84129	0.294	0	0	1.64727	1.82833
	2014	0.00141	0.52415	0.79147	0.28387	0	0	1.53981	1.79053
	2015	0.0013	0.42554	0.74853	0.27766	0	0	1.43257	1.74991
	2016	0.00119	0.34851	0.68699	0.27859	0	0	1.34919	1.69554
	2017	0.00114	0.32024	0.62711	0.30617	0	0	1.31407	1.67003
	j. OC
	Unit: Tg	Power	Industry	Residential	Transportation	Solvent Use	Agriculture	Activity kept frozen	Pollution control frozen
	2010	2e-05	0.59004	2.481	0.10702	0	0	3.17808	3.17808
	2011	1e-05	0.6392	2.47316	0.10535	0	0	3.17324	3.22256
	2012	1e-05	0.60956	2.46468	0.10701	0	0	3.12945	3.22989
	2013	1e-05	0.60481	2.36673	0.10621	0	0	3.10098	3.15485
	2014	0	0.51519	2.21893	0.10222	0	0	2.98663	3.0278
	2015	0	0.40195	2.04672	0.10114	0	0	2.86768	2.86021
	2016	0	0.31726	1.86277	0.10033	0	0	2.76564	2.6928
	2017	0	0.28311	1.68988	0.1085	0	0	2.7058	2.55377
	k. CO2
	Unit: Tg	Power	Industry	Residential	Transportation	Solvent Use	Agriculture	Activity kept frozen	Pollution control frozen
	2010	2864.83	4914.27	567.843	682.463	0	0	9029.41	9029.41
	2011	3365.23	5354.65	609.905	735.695	0	0	9047.69	10047.2
	2012	3361.27	5584.48	652.149	802.181	0	0	9056.63	10372.9
	2013	3431.02	5569.89	600.572	849.378	0	0	9032.47	10447.8
	2014	3359.36	5530.32	620.062	864.03	0	0	9082.25	10320.9
	2015	3318.75	5450.01	651.468	926.939	0	0	9103.06	10273.5
	2016	3399.87	5290.08	661.87	938.785	0	0	9107.15	10212.9
	2017	3619.19	5160.96	676.477	977.638	0	0	9113.48	10350.2

## Sheet: Fig4
	Figure 4. Changes in China’s emissions by sector and year
	a. SO2
	Unit: Tg	Power	Industry	Residential	Transportation	Solvent Use	Agriculture	Total
	2010	0	0	0	0	0	0	0
	2011	0.14109	0.93106	0.1784	0.01767	0	0	1.26821
	2012	-0.92616	1.20863	0.32944	0.03939	0	0	0.65131
	2013	-1.8258	-0.56282	-0.04337	0.05588	0	0	-2.37611
	2014	-2.87215	-4.26648	-0.29293	0.06206	0	0	-7.3695
	2015	-3.84436	-6.59214	-0.53521	0.08155	0	0	-10.8902
	2016	-5.11013	-8.72732	-0.68635	0.08626	0	0	-14.4375
	2017	-5.9485	-10.4303	-1.0278	0.09861	0	0	-17.308
	b. NOx
	Unit: Tg	Power	Industry	Residential	Transportation	Solvent Use	Agriculture	Total
	2010	0	0	0	0	0	0	0
	2011	0.86207	1.00899	0.0274	0.28946	0	0	2.18793
	2012	0.43632	1.38329	0.0517	0.82005	0	0	2.69136
	2013	-0.6828	1.1516	-0.05509	0.81938	0	0	1.23308
	2014	-2.4464	0.86889	-0.08417	0.47279	0	0	-1.18888
	2015	-3.54947	0.58327	-0.12122	0.31132	0	0	-2.7761
	2016	-3.98849	0.1466	-0.15616	0.04039	0	0	-3.95765
	2017	-4.44338	0.07455	-0.18397	0.06271	0	0	-4.49008
	c. NMVOC
	Unit: Tg	Power	Industry	Residential	Transportation	Solvent Use	Agriculture	Total
	2010	0	0	0	0	0	0	0
	2011	0.01091	0.58503	0.01167	-0.30855	0.75422	0	1.05328
	2012	0.01082	0.98439	0.01957	-0.43177	1.64242	0	2.22543
	2013	0.01239	1.20525	-0.21163	-0.47544	1.69798	0	2.22855
	2014	0.01074	1.32771	-0.44939	-0.9438	3.2582	0	3.20346
	2015	0.01061	1.48858	-0.77529	-0.67208	2.58173	0	2.63354
	2016	0.01273	1.43624	-1.09733	-1.09848	3.23858	0	2.49174
	2017	0.0179	1.83442	-1.39138	-1.27347	3.56508	0	2.75255
	d. NH3
	Unit: Tg	Power	Industry	Residential	Transportation	Solvent Use	Agriculture	Total
	2010	0	0	0	0	0	0	0
	2011	0	0.01999	-0.0056	0.00232	0	0.34592	0.36263
	2012	0	0.06479	-0.00981	0.00466	0	0.45952	0.51916
	2013	0	0.07956	-0.02707	0.00835	0	0.39176	0.4526
	2014	0	0.06395	-0.04751	0.00944	0	0.34192	0.3678
	2015	0	0.08821	-0.07237	0.01454	0	0.27385	0.30424
	2016	0	0.04308	-0.09633	0.01553	0	0.18264	0.14492
	2017	0	0.03125	-0.11752	0.01696	0	0.15628	0.08697
	e. CO
	Unit: Tg	Power	Industry	Residential	Transportation	Solvent Use	Agriculture	Total
	2010	0	0	0	0	0	0	0
	2011	0.63762	-3.36321	0.69625	-1.70894	0	0	-3.73829
	2012	0.71439	-5.72944	1.47077	-2.59685	0	0	-6.14114
	2013	0.90108	-6.78504	-1.6658	-2.20875	0	0	-9.75851
	2014	0.71242	-14.2973	-4.28325	-4.71485	0	0	-22.583
	2015	0.67766	-23.4606	-6.954	-3.07411	0	0	-32.8111
	2016	0.78565	-28.9392	-10.5315	-5.76827	0	0	-44.4534
	2017	1.04795	-30.485	-13.9957	-6.77279	0	0	-50.2056
	f. TSP
	Unit: Tg	Power	Industry	Residential	Transportation	Solvent Use	Agriculture	Total
	2010	0	0	0	0	0	0	0
	2011	0.1024	0.74072	0.05038	-0.00818	0	0	0.88532
	2012	-0.00628	0.86288	0.08144	0.0022	0	0	0.94023
	2013	-0.09684	-0.09056	-0.20961	-0.00243	0	0	-0.39945
	2014	-0.30792	-4.34104	-0.52834	-0.02317	0	0	-5.20046
	2015	-0.40616	-8.98453	-0.87241	-0.03135	0	0	-10.2944
	2016	-0.44345	-12.5907	-1.24956	-0.03166	0	0	-14.3154
	2017	-0.43125	-13.5508	-1.60795	0.01552	0	0	-15.5745
	g. PM10
	Unit: Tg	Power	Industry	Residential	Transportation	Solvent Use	Agriculture	Total
	2010	0	0	0	0	0	0	0
	2011	0.08931	0.13862	0.04154	-0.00875	0	0	0.26071
	2012	0.01442	0.04098	0.07343	0.00101	0	0	0.12984
	2013	-0.05697	-0.30031	-0.14024	-0.00416	0	0	-0.50168
	2014	-0.22946	-1.52419	-0.42222	-0.02557	0	0	-2.20144
	2015	-0.30816	-2.95679	-0.726	-0.03346	0	0	-4.02442
	2016	-0.3523	-4.06911	-1.07394	-0.03421	0	0	-5.52956
	2017	-0.35839	-4.40459	-1.40598	0.01297	0	0	-6.15599
	h. PM2.5
	Unit: Tg	Power	Industry	Residential	Transportation	Solvent Use	Agriculture	Total
	2010	0	0	0	0	0	0	0
	2011	0.06855	0.06935	0.02098	-0.00924	0	0	0.14964
	2012	0.02759	0.00706	0.03624	1e-05	0	0	0.07091
	2013	-0.01829	-0.26552	-0.14484	-0.00556	0	0	-0.43421
	2014	-0.13611	-0.92472	-0.39786	-0.02757	0	0	-1.48625
	2015	-0.19122	-1.73961	-0.68218	-0.03518	0	0	-2.64819
	2016	-0.24334	-2.39647	-0.99844	-0.03625	0	0	-3.6745
	2017	-0.27108	-2.61183	-1.29825	0.01094	0	0	-4.17023
	i. BC
	Unit: Tg	Power	Industry	Residential	Transportation	Solvent Use	Agriculture	Total
	2010	0	0	0	0	0	0	0
	2011	0.00011	0.04685	0.00757	-0.0037	0	0	0.05084
	2012	2e-05	0.02213	0.02036	0.00315	0	0	0.04566
	2013	-7e-05	0.02019	-0.00339	-1e-05	0	0	0.01672
	2014	-0.00031	-0.06488	-0.05321	-0.01014	0	0	-0.12854
	2015	-0.00042	-0.16349	-0.09615	-0.01635	0	0	-0.27641
	2016	-0.00052	-0.24052	-0.1577	-0.01542	0	0	-0.41416
	2017	-0.00058	-0.26879	-0.21757	0.01216	0	0	-0.47478
	j. OC
	Unit: Tg	Power	Industry	Residential	Transportation	Solvent Use	Agriculture	Total
	2010	0	0	0	0	0	0	0
	2011	-1e-05	0.04916	-0.00784	-0.00167	0	0	0.03964
	2012	-1e-05	0.01952	-0.01632	-1e-05	0	0	0.00319
	2013	-1e-05	0.01477	-0.11427	-0.00081	0	0	-0.10032
	2014	-1e-05	-0.07485	-0.26206	-0.0048	0	0	-0.34173
	2015	-1e-05	-0.18809	-0.43428	-0.00589	0	0	-0.62827
	2016	-1e-05	-0.27278	-0.61823	-0.00669	0	0	-0.89771
	2017	-1e-05	-0.30694	-0.79112	0.00148	0	0	-1.09658
	k. CO2
	Unit: Tg	Power	Industry	Residential	Transportation	Solvent Use	Agriculture	Total
	2010	0	0	0	0	0	0	0
	2011	500.4	440.379	42.0618	53.2326	0	0	1036.07
	2012	496.439	670.207	84.3066	119.718	0	0	1370.67
	2013	566.186	655.62	32.7297	166.915	0	0	1421.45
	2014	494.529	616.042	52.2192	181.567	0	0	1344.36
	2015	453.919	535.736	83.6249	244.476	0	0	1317.76
	2016	535.044	375.801	94.0275	256.322	0	0	1261.19
	2017	754.359	246.681	108.634	295.175	0	0	1404.85

## Sheet: Fig5
	Figure 5. China’s emission pathways from 2010–2017
	a
	Unit: Tg	SO2_x	SO2_y	CO_x	CO_y	NOx_x	NOx_y	NH3_x	NH3_y	NMVOC_x	NMVOC_y	CO2_x	CO2_y
	2010	0	0	0	0	0	0	0	0	0	0	0	0
	2011	2.73352	-1.46531	9.1882	-12.9265	2.56589	-0.37796	0.36263	0	1.88205	-0.82877	1017.79	18.281
	2012	3.23529	-2.58399	15.0648	-21.206	3.60127	-0.90991	0.51916	0	3.68375	-1.45832	1343.45	27.224
	2013	2.3215	-4.69761	19.8077	-29.5662	3.84465	-2.61157	0.452591	7e-06	4.52565	-2.2971	1418.39	3.061
	2014	0.88464	-8.25414	17.7853	-40.3683	3.31313	-4.50202	0.367804	0	6.38297	-3.17952	1291.52	52.842
	2015	0.56813	-11.4583	19.6922	-52.5033	3.17467	-5.95077	0.304235	0	6.70267	-4.06913	1244.11	73.651
	2016	-0.57749	-13.86	16.8208	-61.2742	2.90864	-6.86629	0.144922	0	7.31766	-4.82592	1183.46	77.737
	2017	0.28315	-17.5911	17.4033	-67.6088	3.75712	-8.24721	0.086945	2.3e-05	8.23023	-5.47768	1320.78	84.069
	b
	Unit: Tg	PM2.5_x	PM2.5_y	BC_x	BC_y	OC_x	OC_y	PM10_x	PM10_y	TSP_x	TSP_y
	2010	0	0	0	0	0	0	0	0	0	0
	2011	0.65254	-0.50291	0.06531	-0.01447	0.04448	-0.00484	1.0058	-0.74509	2.0246	-1.13928
	2012	0.92427	-0.85337	0.10452	-0.05886	0.05182	-0.04863	1.42728	-1.29744	2.99592	-2.05568
	2013	0.97535	-1.40956	0.09889	-0.08217	-0.02322	-0.07709	1.56585	-2.06753	3.62283	-4.02228
	2014	0.74088	-2.22712	0.06109	-0.18963	-0.15028	-0.19145	1.29049	-3.49193	3.25198	-8.45244
	2015	0.39888	-3.04706	0.02046	-0.29687	-0.31787	-0.3104	0.91111	-4.93553	2.69987	-12.9943
	2016	0.05049	-3.72498	-0.0339	-0.38026	-0.48528	-0.41244	0.55048	-6.08004	2.38169	-16.6971
	2017	0.00055	-4.17078	-0.05942	-0.41537	-0.62431	-0.47228	0.59695	-6.75294	2.86101	-18.4355

## Sheet: Fig6
	Figure 6. Energy consumption of hydrocarbon fuels from 2010 to 2017
	Unit: EJ	Coal	Oil	Traditional biofuel	Natural gas
	2010	75.2979	15.5808	7.39971	3.28845
	2011	83.2857	16.6661	7.27235	3.67089
	2012	84.875	17.8023	7.14498	4.44927
	2013	86.9268	18.5089	6.7922	4.7583
	2014	84.218	18.8464	6.34029	5.32826
	2015	82.9994	20.0481	5.70626	5.7712
	2016	81.3905	20.4401	5.13564	6.2329
	2017	81.4962	21.3099	4.62207	7.15537

## Sheet: Fig7
	Figure 7. Drivers of emission changes for different emission species
	Unit: Tg		SO2	NOx	CO	PM2.5	BC	OC
	2010		27.8	26.5	186.4	11.8	1.7	3.2
	Activity growth	Power	1.2	1.7	1.1	0.2	<0.1	<0.1
		Industry	-1	0.9	7.6	0.8	<0.1	<0.1
		Residential	<0.1	-0.2	-13.5	-1	-0.1	-0.7
		Transportation	0.1	1.4	22.2	0.1	0.1	<0.1
	Pollution control	Power	-7.1	-6.1	<0.1	-0.5	<0.1	<0.1
		Industry	-9.5	-0.9	-38.1	-3.4	-0.3	-0.3
		Residential	-1	<0.1	-0.5	-0.3	-0.1	-0.1
		Transportation	<0.1	-1.3	-29	-0.1	<0.1	<0.1
	2017		10.5	22	136.2	7.6	1.3	2.1

## Sheet: Fig8
	Figure 8. Emission trends compared with satellite- and ground-based observations
	a
		SO2 emissions	NOx emissions	NH3 emissions	NMVOC emissions	PM2.5 emissions	Surface observed PM2.5	Satellite retrieved PM2.5
	2010	1.09342	0.95549	0.95744	0.92067	1.03824		1.02163
	2011	1.14328	1.03446	0.99154	0.95817	1.05141		1.02153
	2012	1.11902	1.05264	1.00626	0.99989	1.04448		0.97447
	2013	1	1	1	1	1	1	1
	2014	0.80368	0.91258	0.99203	1.0347	0.90736	0.8888	0.92946
	2015	0.66527	0.85529	0.98605	1.01442	0.80503	0.76348	0.82049
	2016	0.5258	0.81264	0.97107	1.00937	0.71466	0.694
	2017	0.41295	0.79342	0.96562	1.01865	0.671	0.65236
	b
		SO2 emissions	Surface observed SO2	OMI SO2 columns	NOx emissions	Surface observed NO2	OMI NO2 columns
	2010	1.09342		1.01754	0.95549		0.94263
	2011	1.14328		1.4194	1.03446		1.08529
	2012	1.11902		1.14401	1.05264		1.00541
	2013	1	1	1	1	1	1
	2014	0.80368	0.80026	0.67631	0.91258	0.95411	0.85536
	2015	0.66527	0.625	0.51745	0.85529	0.88636	0.75818
	2016	0.5258	0.525	0.36545	0.81264	0.88636	0.74024
	2017	0.41295	0.43417	0.27459	0.79342	0.90764	0.69927

## Sheet: Fig9
	Figure 9. Changes in emission percentages across source sectors from 2010 to 2017
		SO2		NOx		CO		NMVOC		PM2.5		BC
		2010	2017	2010	2017	2010	2017	2010	2017	2010	2017	2010	2017
	Power	0.2797	0.1743	0.326	0.1905	0.0203	0.0355	0.0026	0.003	0.0707	0.0739	0.001	0.0009
	Industrial boilers	0.4052	0.3296	0.2491	0.3124	0.0704	0.0605	0.0635	0.0399	0.1106	0.0926	0.0613	0.0463
	Iron & steel	0.0677	0.0793	0.0206	0.0299	0.2151	0.125	0.0017	0.002	0.1073	0.0979	0.0269	0.0364
	Cement	0.0382	0.0461	0.0599	0.0584	0.0512	0.032	0.0166	0.0175	0.1166	0.1139	0.0048	0.0042
	Coke production	0.0142	0.0154	0	0	0.0043	0.0052	0.0216	0.0222	0.0626	0.0261	0.128	0.0475
	Other industries	0.0644	0.098	0.016	0.0187	0.0864	0.1386	0.2009	0.2576	0.1204	0.1273	0.1197	0.1209
	Residential	0.1222	0.2257	0.039	0.0386	0.3806	0.4182	0.1931	0.1259	0.3667	0.397	0.4884	0.4998
	Road transport	0.0062	0.0244	0.2073	0.2294	0.1642	0.1737	0.2265	0.1586	0.0248	0.0338	0.0861	0.1052
	Off-road transport	0.0022	0.0073	0.0821	0.122	0.0073	0.0113	0.0078	0.0087	0.0203	0.0375	0.0839	0.1388
	Solvent use	0	0	0	0	0	0	0.2656	0.3647	0	0	0	0
