# Supplementary material for: Trends in China's anthropogenic emissions since 2010 as the consequence of clean air actions
Source: Copernicus journal article supplement (doi:10.5194/acp-18-14095-2018), 2018-10-04
Supplement: Supplementary file 2 [file acp-18-14095-2018-supplement.zip]

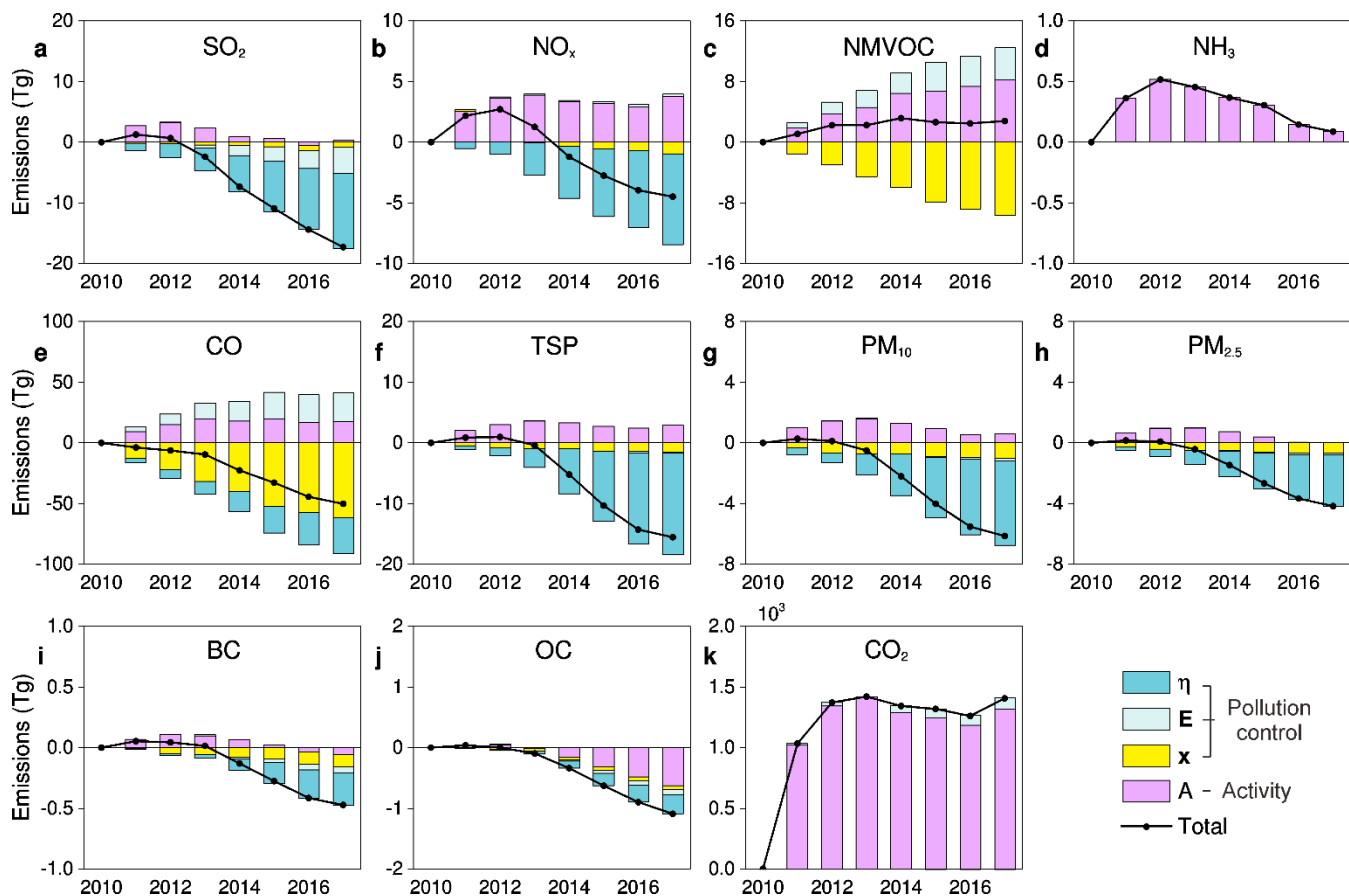

**Figure S1. Decomposition analysis results of changes in air pollutants and CO<sub>2</sub> emissions.** The change in 2010–2017 emissions are decomposed into four factors (i.e., A, x, E and  $\eta$ ) using the method of Index Decomposition Analysis (Sect. 3.2). A represents the contribution from activities, x represents the effect from technology evolving over time, E includes fuel quality improvement (e.g., low sulfur, low ash, high heating value coals) as well as deterioration of vehicle emissions (figures c and e), and  $\eta$  represents emission reductions caused by end-of-pipe abatement measures. The black curve represents the change in total emissions.
