# Supplementary material for: Trends in China's anthropogenic emissions since 2010 as the consequence of clean air actions
Source: Copernicus journal article supplement (doi:10.5194/acp-18-14095-2018), 2018-10-04
Supplement: Supplementary file 3 [file acp-18-14095-2018-supplement.zip]

Archive with 3 entries (3 files):
- acp-18-14095-2018-supplement-title-page.pdf
- SI_12Aug2018.pdf
- Figure_data.xlsx
